# Supplementary material for: Simultaneous determination of hydroquinone and catechol in compost bioremediation using a tyrosinase biosensor and artificial neural networks
Source: Royal Society of Chemistry journal article supplement (doi:10.1039/c3ay41976b), 2014-01-01
Supplement: c3ay41976b.pdf [file c3ay41976b.pdf]

## Supplementary Materials

### Simultaneous determination of hydroquinone and catechol in compost bioremediation using a tyrosinase biosensor and artificial neural networks

ZHOU Yaoyu<sup>1,2</sup>, TANG Lin<sup>1,2,1</sup>, ZENG Guangming<sup>1,2,\*</sup>, ZHANG Yi<sup>1,2</sup>, LI Zhen<sup>3</sup>, LIU Yuanyuan<sup>1,2</sup>,  
CHEN Jun<sup>1,2</sup>, YANG Guide<sup>1,2</sup>, ZHOU Lu<sup>1,2</sup>, ZHANG Sheng<sup>1,2</sup>

*1 College of Environmental Science and Engineering, Hunan University, Changsha, 410082, PR China*

*2 Key Laboratory of Environmental Biology and Pollution Control, Hunan University, Ministry of  
Education, Changsha 410082, Hunan*

### Contents

Table S1 Detailed results obtained for the spiked compost extract samples against added concentrations of the catechol considered. Error was also expressed for each compost extract sample.

Table S2 Detailed results obtained for the spiked compost extract samples against added concentrations of the hydroquinone considered. Error was also expressed for each compost extract sample.

Fig. S1 Examples of the differential pulse voltammetry for the mixtures of two phenols. Concentrations for each phenol are: (a) 0.35 μM (HQ), 0.11 μM (CC).

---

<sup>1</sup> Corresponding author: Tel.: +86-731-88822778; Fax.: +86-731-88822778  
E-mail: [tanglin@hnu.edu.cn](mailto:tanglin@hnu.edu.cn)(L. Tang), [zgming@hnu.edu.cn](mailto:zgming@hnu.edu.cn)(G.M. Zeng).

**Table S1** Detailed results obtained for the spiked compost extract samples against added concentrations

of the catechol considered. Error was also expressed for each compost extract sample.

| Compost extract sample | CC concentration / $\mu\text{M}$ |                 |                 | Error ( $\tau_1$ ) |            | Error ( $\tau_2$ ) |            | (RSD)    |          |
|------------------------|----------------------------------|-----------------|-----------------|--------------------|------------|--------------------|------------|----------|----------|
|                        | Added                            | $^L$ predicted  | $^B$ predicted  | $^L\tau_1$         | $^B\tau_1$ | $^L\tau_2$         | $^B\tau_2$ | $^LRSD$  | $^BRSD$  |
| 1                      | 1.3                              | 1.1 $\pm$ 0.37  | 1.5 $\pm$ 0.33  | -15.385%           | 15.3846%   | 15.385%            | 15.385%    | 11.7851% | 10.1015% |
| 2                      | 4.6                              | 5.3 $\pm$ 0.41  | 5.0 $\pm$ 0.18  | 15.2174%           | 8.6957%    | 15.217%            | 8.6957%    | 9.9995%  | 5.8926%  |
| 3                      | 17.8                             | 17.4 $\pm$ 0.23 | 17.9 $\pm$ 0.11 | -2.247%            | 0.5618%    | 2.247%             | 0.5618%    | 1.6071%  | 0.3961%  |
| 4                      | 25.6                             | 27.5 $\pm$ 0.44 | 28.0 $\pm$ 0.17 | 7.4219%            | 9.375%     | 7.4219%            | 9.375%     | 5.0603%  | 6.3323%  |
| 5                      | 32.3                             | 30.5 $\pm$ 0.39 | 31 $\pm$ 0.29   | -5.573%            | -4.025%    | 5.573%             | 4.025%     | 4.0535%  | 2.9044%  |
| 6                      | 39.5                             | 37.7 $\pm$ 0.35 | 40.3 $\pm$ 0.30 | -4.557%            | 2.0253%    | 4.557%             | 2.0253%    | 3.2974%  | 1.4178%  |
| 7                      | 59.3                             | 63.5 $\pm$ 0.42 | 60.2 $\pm$ 0.15 | 7.0826%            | 1.5177%    | 7.0826%            | 1.5177%    | 4.8369%  | 1.0651%  |
| 8                      | 95.5                             | 70.6 $\pm$ 0.47 | 98.4 $\pm$ 0.26 | -26.073%           | 3.0366%    | 26.073%            | 3.0366%    | 21.2004% | 2.1151%  |
| average                | —                                | —               | —               | -3.014%            | 4.5715%    | 10.445%            | 5.578%     | 7.73%    | 3.7781%  |

$^B$  BP-ANN model;  $^L$  linear model

$$\tau_1 = \frac{x_1 - x_0}{x_0} \times 100\% \quad \tau_2 = \frac{|x_1 - x_0|}{x_0} \times 100\%$$

**Table S2** Detailed results obtained for the spiked compost extract samples against added concentrations

of the hydroquinone considered. Error was also expressed for each compost extract sample.

| Compost extract sample | HQ concentration / $\mu\text{M}$ |                 |                  | Error ( $\tau_1$ ) |            | Error ( $\tau_2$ ) |            | (RSD)    |          |
|------------------------|----------------------------------|-----------------|------------------|--------------------|------------|--------------------|------------|----------|----------|
|                        | Added                            | $^L$ predicted  | $^B$ predicted   | $^L\tau_1$         | $^B\tau_1$ | $^L\tau_2$         | $^B\tau_2$ | $^LRSD$  | $^BRSD$  |
| 1                      | 2.5                              | 2.0 $\pm$ 0.46  | 2.8 $\pm$ 0.36   | -20%               | 12%        | 20%                | 12%        | 15.7135% | 8.005%   |
| 2                      | 15.5                             | 14.3 $\pm$ 0.39 | 14.9 $\pm$ 0.28  | -7.742%            | -3.871%    | 7.742%             | 3.871%     | 5.6948%  | 2.7912%  |
| 3                      | 20.5                             | 20.0 $\pm$ 0.44 | 20.6 $\pm$ 0.37  | -2.439%            | 0.4878%    | 2.439%             | 0.4878%    | 1.7459%  | 0.3441%  |
| 4                      | 36.3                             | 31.2 $\pm$ 0.40 | 32.0 $\pm$ 0.16  | -14.05%            | -11.846%   | 14.05%             | 11.846%    | 10.6852% | 8.9035%  |
| 5                      | 10.5                             | 12.5 $\pm$ 0.29 | 8.9 $\pm$ 0.19   | 19.0476%           | -15.238%   | 19.0476%           | 15.238%    | 12.2975% | 11.6636% |
| 6                      | 60.5                             | 57.1 $\pm$ 0.36 | 58.6 $\pm$ 0.23  | -5.62%             | -3.14%     | 5.62%              | 3.14%      | 4.0887%  | 2.2561%  |
| 7                      | 83.6                             | 65.8 $\pm$ 0.32 | 85.9 $\pm$ 0.29  | -21.292%           | 2.7512%    | 21.292%            | 2.7512%    | 16.8494% | 1.919%   |
| 8                      | 105.4                            | 78.6 $\pm$ 0.38 | 109.8 $\pm$ 0.21 | -25.427%           | 4.1746%    | 25.427%            | 4.1746%    | 20.5983% | 2.8915%  |
| average                | —                                | —               | —                | -9.69%             | -1.835%    | 14.45%             | 7%         | 10.9592% | 4.8468%  |

$^B$  BP-ANN model;  $^L$  linear model

$$\tau_1 = \frac{x_1 - x_0}{x_0} \times 100\% \quad \tau_2 = \frac{|x_1 - x_0|}{x_0} \times 100\%$$

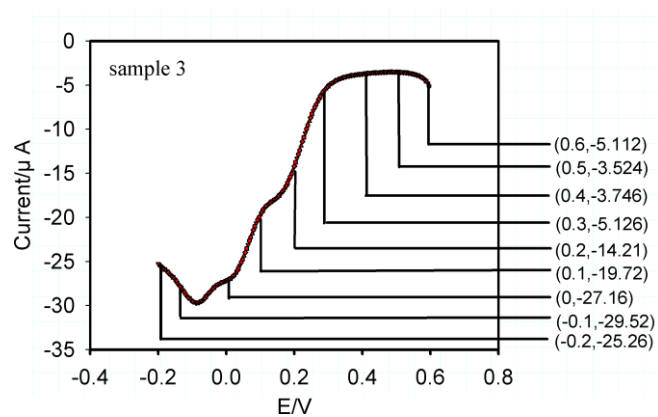

**Fig. S1** Examples of the differential pulse voltammetry for the mixtures of two phenols.

Concentrations for each phenol are: (a) 0.35 μM (HQ), 0.11 μM (CC).

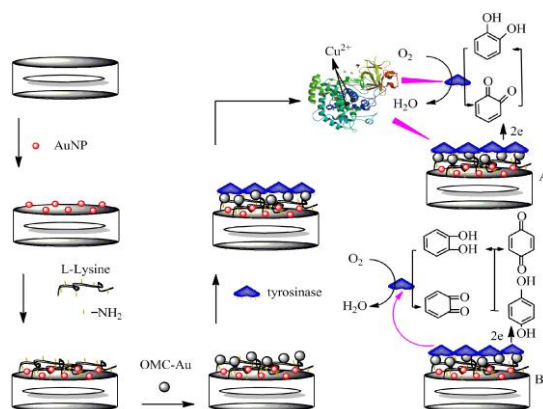

**Scheme S1.** Schematic diagram of the tyrosinase biosensor preparation and schematic diagram of the tyrosinase biosensor proposed mechanism for the HQ (B) and CC (A) electrocatalytic detection<sup>1</sup>.

## References

- (1) T. Lin, Y. Y. Zhou, G. M. Zeng, Z. Li, Y. Y. Liu, Y. Zhang, G. Q. Chen, G. D. Yang, X. X. Lei and M. S. Wu, *Analyst*, 2013, **138**, 3552-3560.
